# Supplementary material
Source: PubMed Central journal article supplement (PMC10285672)
Supplement: jamacardiol-e231643-s002.pdf [file jamacardiol-e231643-s002.pdf]

## Data Sharing Statement

Almarzooq. Comparative Effectiveness of Percutaneous Microaxial Left Ventricular Assist Device vs Intra-Aortic Balloon Pump or No Mechanical Circulatory Support in Patients With Cardiogenic Shock. *JAMA Cardiol.* Published June 21, 2023.  
doi:10.1001/jamacardio.2023.1643

### Data

**Data available:** No

### Additional Information

**Explanation for why data not available:** This study was conducted using a deidentified medicare claims database and data can be made available upon request.
